# Supplementary material
Source: publisher figshare collection journal article supplement (https://karger.figshare.com/articles/dataset/_/11603541)

**A**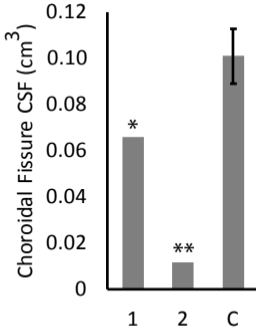

\*  $p \leq 0.05$   
\*\*  $p \leq 0.001$

**B**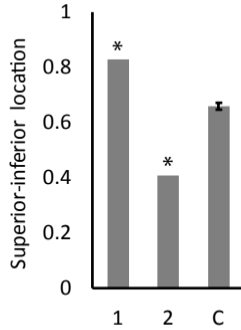**C**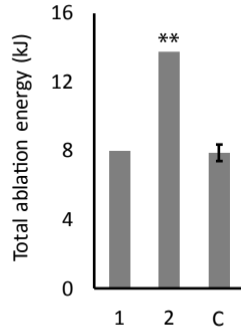**D**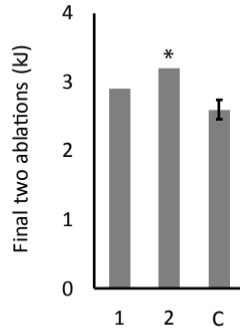**E**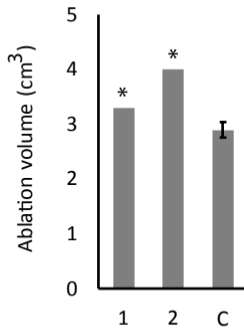

Patient(s)

Supplement: Supplementary file 1 [file 1]

Patient

Coronal

Axial

Sagittal

1:  
(Left)

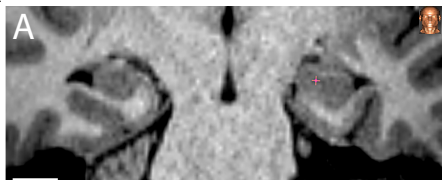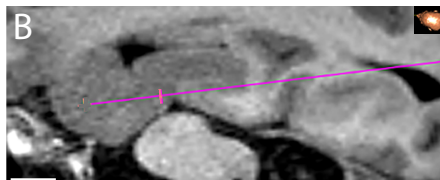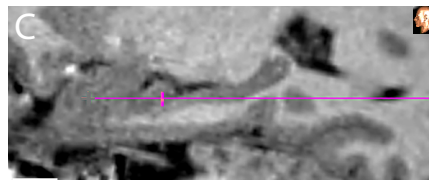

2:  
(Right)

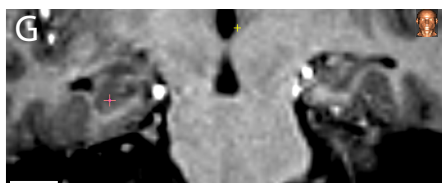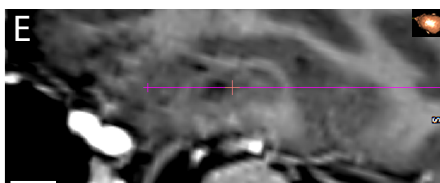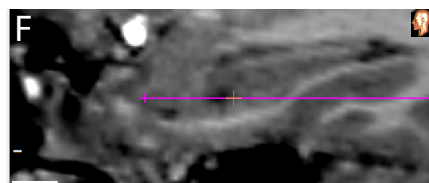

3:  
(Right)

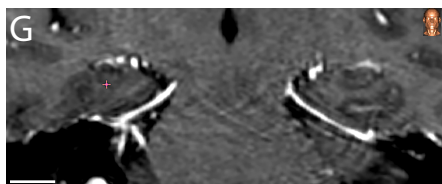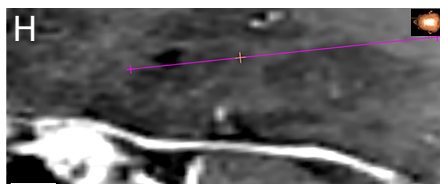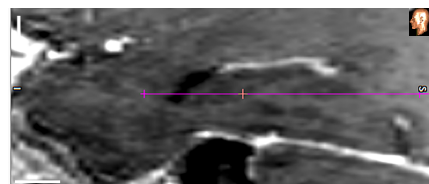

4:  
(Left)

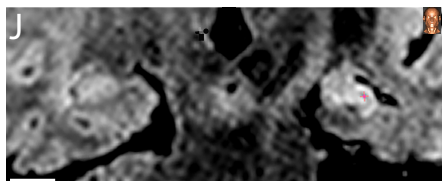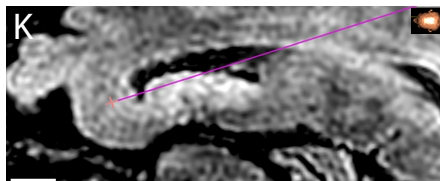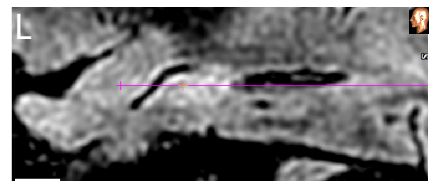

5:  
(Left)

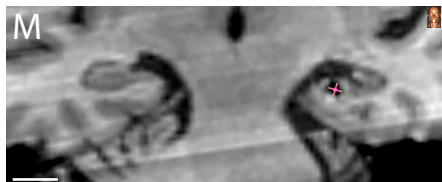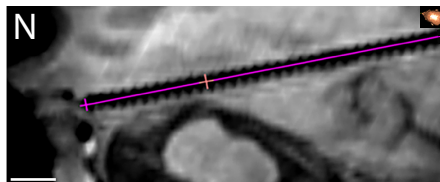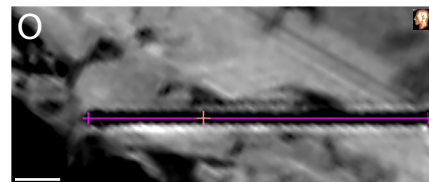

6:  
(Right)

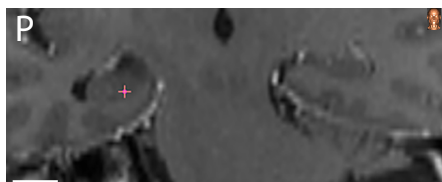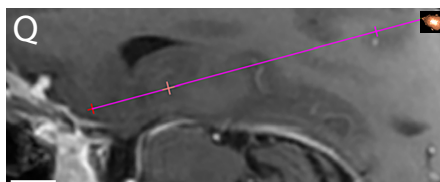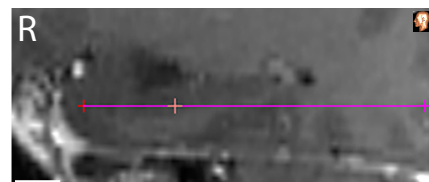

Supplement: Supplementary file 2 [file 1]

**A**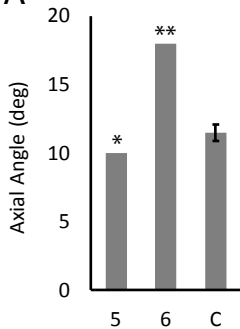

\*  $p \leq 0.05$   
\*\*  $p \leq 0.001$

**B**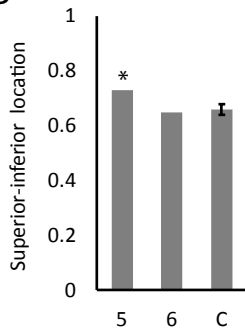**C**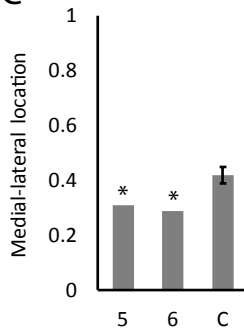

Patient(s)

**D**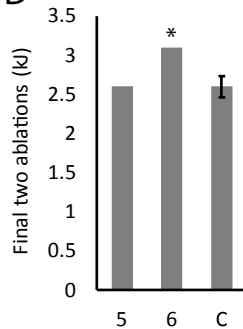**E**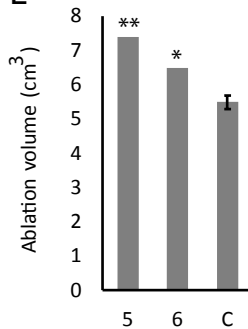

Supplement: Supplementary file 3 [file 1]

**A**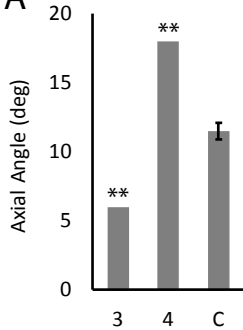

\*  $p \leq 0.05$   
\*\*  $p \leq 0.001$

**B**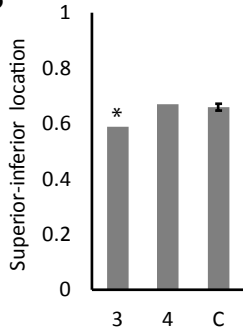**C**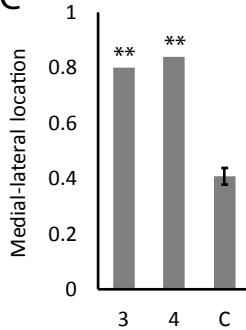**D**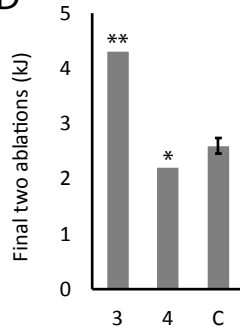**E**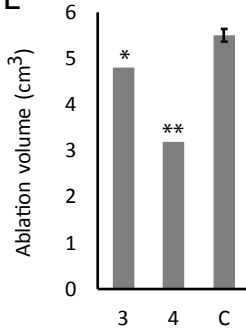

Patient(s)

Supplement: Supplementary file 4 [file 1]
